# Supplementary material
Source: HighWire-hosted journal article supplement (https://www.cfp.ca/highwire/filestream/35960/field_highwire_adjunct_files/0/COWS_and_SOWS_scales.pdf)
Supplement: COWS_and_SOWS_scales.pdf [file COWS_and_SOWS_scales.pdf]

## Box 1: Identifying Withdrawal Using COWS scores

| COWS                                                                                                                                                                                                                                                                                                                     |          |   |        |       |       |
|--------------------------------------------------------------------------------------------------------------------------------------------------------------------------------------------------------------------------------------------------------------------------------------------------------------------------|----------|---|--------|-------|-------|
| Clinical Opioid Withdrawal Scale (COWS)                                                                                                                                                                                                                                                                                  | Interval | 0 | 30 min | 2 hrs | 4 hrs |
| Date:                                                                                                                                                                                                                                                                                                                    | Time     |   |        |       |       |
| <b>Resting Heart Rate (measure after lying or sitting for 1 minute)</b><br><br><b>0</b> HR 80 or below <b>1</b> HR 81-100<br><b>2</b> HR 1001-120 <b>4</b> HR greater than 120                                                                                                                                           |          |   |        |       |       |
| <b>Sweating (preceding 30 minutes and not related to room temp /activity):</b> <b>0</b> no report of chills or flushing<br><br><b>1</b> subjective report of chills or flushing<br><br><b>2</b> flushed or observable moistness on face<br><br><b>3</b> beads of sweat on brow or face <b>4</b> sweat streaming off face |          |   |        |       |       |
| <b>Restlessness (observe during assessment):</b><br><br><b>0</b> able to sit still<br><br><b>1</b> reports difficulty sitting still, but is able to do so<br><br><b>3</b> frequent shifting or extraneous movements of legs/arms <b>5</b> unable to sit still for more than a few seconds                                |          |   |        |       |       |
| <b>Pupil size:</b><br><br><b>0</b> pupils pinned or normal size for room light<br><br><b>1</b> pupils possibly larger than normal for room light<br><br><b>2</b> pupils moderately dilated<br><br><b>5</b> pupils so dilated that only the rim of the iris is visible                                                    |          |   |        |       |       |
| <b>Bone or joint aches (not including existing joint pains):</b><br><br><b>0</b> not present                                                                                                                                                                                                                             |          |   |        |       |       |

|                                                                                                                                                                                                                                                               |  |  |  |  |
|---------------------------------------------------------------------------------------------------------------------------------------------------------------------------------------------------------------------------------------------------------------|--|--|--|--|
| <p><b>1</b> mild diffuse discomfort</p> <p><b>2</b> patient reports severe diffuse aching of joints/ muscles</p> <p><b>4</b> patient is rubbing joints / muscles plus unable to sit still due to discomfort</p>                                               |  |  |  |  |
| <p><b>Runny nose or tearing (not related to URTI or allergies): 0</b> not present</p> <p><b>1</b> nasal stuffiness or unusually moist eyes</p> <p><b>2</b> nose running or tearing</p> <p><b>4</b> nose constantly running or tears streaming down cheeks</p> |  |  |  |  |
| <p><b>GI upset (over last 30 minutes): 0</b> no GI symptoms</p> <p><b>1</b> stomach cramps</p> <p><b>2</b> nausea or loose stool</p> <p><b>3</b> vomiting or diarrhoea</p> <p><b>5</b> multiple episodes of vomiting or diarrhoea</p>                         |  |  |  |  |
| <p><b>Tremor (observe outstretched hands): 0</b> no tremor</p> <p><b>1</b> tremor can be felt, but not observed <b>2</b> slight tremor observable</p> <p><b>4</b> gross tremor or muscle twitching</p>                                                        |  |  |  |  |
| <p><b>Yawning (observe during assessment):</b></p> <p><b>0</b> no yawning</p> <p><b>1</b> yawning once or twice during assessment</p> <p><b>2</b> yawning three or more times during assessment <b>4</b> yawning several times/minute</p>                     |  |  |  |  |
| <p><b>Anxiety or irritability</b></p> <p><b>0</b> none</p> <p><b>1</b> patient reports increasing irritability or anxiousness</p> <p><b>2</b> patient obviously irritable or anxious</p>                                                                      |  |  |  |  |

|                                                                                                                                                                                         |  |  |  |  |
|-----------------------------------------------------------------------------------------------------------------------------------------------------------------------------------------|--|--|--|--|
| 4 Patient so irritable or anxious that participation in the assessment is difficult                                                                                                     |  |  |  |  |
| <b>Gooseflesh skin</b><br><br><b>0</b> skin is smooth<br><br><b>3</b> piloerection (goosebumps) of skin can be felt or hairs standing up on arms<br><br><b>5</b> prominent piloerection |  |  |  |  |

**SCORE INTERPRETATION:**  
 5-12 = MILD    13-24 = MODERATE    25-36 = MODERATELY SEVERE    > 36 = SEVERE WITHDRAWAL  
[http://www.metaphi.ca/assets/documents/provider%20tools/Scale\\_COWS.pdf](http://www.metaphi.ca/assets/documents/provider%20tools/Scale_COWS.pdf)

## Box 2: Identifying Withdrawal Using SOWS scores

| Subjective Clinical Withdrawal Scale |                           |            |          |            |             |   |
|--------------------------------------|---------------------------|------------|----------|------------|-------------|---|
| Item                                 | Symptom                   | Not at all | A little | Moderately | Quite a bit |   |
| Extremely                            |                           |            |          |            |             |   |
| 1                                    | I feel anxious            | 0          | 1        | 2          | 3           | 4 |
| 2                                    | I feel like yawning       | 0          | 1        | 2          | 3           | 4 |
| 3                                    | I am perspiring           | 0          | 1        | 2          | 3           | 4 |
| 4                                    | My eyes are teary         | 0          | 1        | 2          | 3           | 4 |
| 5                                    | My nose is running        | 0          | 1        | 2          | 3           | 4 |
| 6                                    | I have goosebumps         | 0          | 1        | 2          | 3           | 4 |
| 7                                    | I am shaking              | 0          | 1        | 2          | 3           | 4 |
| 8                                    | I have hot flushes        | 0          | 1        | 2          | 3           | 4 |
| 9                                    | I have cold flushes       | 0          | 1        | 2          | 3           | 4 |
| 10                                   | My bones and muscles ache | 0          | 1        | 2          | 3           | 4 |

|                                                                                                                                 |   |   |   |   |   |
|---------------------------------------------------------------------------------------------------------------------------------|---|---|---|---|---|
| 11 I feel restless                                                                                                              | 0 | 1 | 2 | 3 | 4 |
| 12 I feel nauseous                                                                                                              | 0 | 1 | 2 | 3 | 4 |
| 13 I feel like vomiting                                                                                                         | 0 | 1 | 2 | 3 | 4 |
| 14 My muscles twitch                                                                                                            | 0 | 1 | 2 | 3 | 4 |
| 15 I have stomach cramps                                                                                                        | 0 | 1 | 2 | 3 | 4 |
| 16 I feel like using now                                                                                                        | 0 | 1 | 2 | 3 | 4 |
| <b>total score:</b> _____                                                                                                       |   |   |   |   |   |
| <a href="https://www.bccsu.ca/wp-content/uploads/2017/08/SOWS.pdf">https://www.bccsu.ca/wp-content/uploads/2017/08/SOWS.pdf</a> |   |   |   |   |   |
